# Supplementary material for: Toward the Reliable Diagnosis of DSM-5 Premenstrual Dysphoric Disorder: The Carolina Premenstrual Assessment Scoring System (C-PASS)
Source: Atypon-hosted journal article supplement (doi:10.1176/appi.ajp.2016.15121510), 2016-08-13
Supplement: appi.ajp.2016.15121510.ds001.pdf [file appi.ajp.2016.15121510.ds001.pdf]

## **The Carolina Premenstrual Assessment Scoring System (C-PASS):**

### **Instructions for Scoring the Cycle-Level Worksheet**

Tory Eisenlohr-Moul, Ph.D.

This worksheet is designed to test if one premenstrual phase and the subsequent postmenstrual phase of a woman show the required pattern of symptoms for a DSM-5 PMDD symptom based on prospective daily ratings collected with the Daily Record of Severity of Problems (Endicott, Harrison, & Nee, 2006). Note that the sheet provides a cycle-level diagnosis; in order to diagnose a woman with MRMD ( $\geq 1$  affective symptom per cycle) or PMDD ( $\geq 5$  symptoms per cycle,  $\geq 1$  affective symptom), at least two symptomatic cycles are required. Items 20 and 22-24 are not included in DSM-5 diagnostic criteria.

**Premenstrual phase:** days -7 to -1 where day -1 represents the day prior to menstrual onset

**Postmenstrual phase:** days 4 to 10 where day 1 represents menstrual onset

#### **Start in the upper left corner and work across to the right by row:**

##### **1. Absolute severity of DRSP item in the premenstrual phase:**

- Identify the highest rating for this DRSP item in the premenstrual phase
- If the rating is  $\geq 4$ , circle Y; otherwise circle N

##### **2. Duration of symptom in the premenstrual phase:**

- Count the number of days in the premenstrual phase with an item rating  $\geq 4$
- If there are at least two such days, circle Y; otherwise circle N

##### **3. Relative symptom change from premenstrual to postmenstrual phase:**

- Calculate the premenstrual mean by averaging the item ratings in the premenstrual phase
- Calculate the postmenstrual mean by averaging the item ratings in the postmenstrual phase
- Calculate the raw cyclical change by subtracting the postmenstrual from the premenstrual mean
- Calculate the woman's "range of scale used" by subtracting 1 from the woman's maximum rating across all DRSP responses in all cycles (this will be constant within a given woman)
- Calculate the percent change relative to the range of scale used by dividing the raw cyclical change (step 3c) by the range of scale used (step 3d) and multiply this number by 100
- If this number is bigger than/equal to 30, circle Y; otherwise, circle N

##### **4. Absolute clearance of symptoms in the postmenstrual phase:**

- Identify the highest item rating in the postmenstrual phase
- If the rating is  $\leq 4$ , circle Y; otherwise circle N

##### **5. Does the DRSP item meet criteria in in this cycle?**

- If you circled Y in steps 1 to 4, circle Y; otherwise circle N

##### **6. Does the DSM-5 symptom meet criteria in this cycle?**

- If the DSM-5 symptom is represented by multiple DRSP items, circle Y if at least one of the corresponding DRSP items meets criteria (see step 5); otherwise circle N
- If the DSM-5 symptom is represented by one DRSP item, circle Y if the corresponding DRSP item meets criteria (see step 5); otherwise circle N

##### **7. Does a core emotional symptom meet criteria in this cycle?**

- If at least one of the DSM-5 core emotional symptoms (Depression, Anxiety, Mood Lability, or Anger/Irritability) meets criteria, circle Y; otherwise circle N

#### **Move down to the lower box labeled "Cycle-level scoring":**

##### **8. Does a core emotional symptom meet criteria this cycle?**

- If step 7 shows a circled Y, circle Y; otherwise circle N

##### **9. Do at least 5 DSM-5 symptoms meet criteria this cycle?**

- Count the number of DSM-5 symptoms meeting criteria (see step 6)
- If at least five DSM-5 symptoms meet criteria this cycle, circle Y; otherwise circle N

##### **10. Cycle-level diagnosis**

- If step 8 shows a circled N, circle "no cycle diagnosis"
- If step 8 shows a circled Y and step 9 shows a circled N, circle "MRMD cycle diagnosis"
- If step 8 shows a circled Y and step 9 shows a circled Y, circle "PMDD cycle diagnosis"

| C-PASS: CYCLE # ___                                                                                |                                    | CLINICAL SIGNIFICANCE DIMENSIONS                           |                                  |                                            |                                           | CYCLICITY DIMENSIONS                                 |                                                             |                                                                 |                                |                                          |                                    |                     |                                  |                                                     |           | DOES DRSP ITEM MEET CRITERIA? | DSM-5 SYMPTOM DOMAIN | DOES DSM-5 SYMPTOM MEET CRITERIA? | DOES A CORE EMOTIONAL SYMPTOM MEET CRITERIA? |
|----------------------------------------------------------------------------------------------------|------------------------------------|------------------------------------------------------------|----------------------------------|--------------------------------------------|-------------------------------------------|------------------------------------------------------|-------------------------------------------------------------|-----------------------------------------------------------------|--------------------------------|------------------------------------------|------------------------------------|---------------------|----------------------------------|-----------------------------------------------------|-----------|-------------------------------|----------------------|-----------------------------------|----------------------------------------------|
|                                                                                                    |                                    | Absolute Severity                                          |                                  | Duration                                   |                                           | Relative Symptom Change                              |                                                             |                                                                 |                                |                                          |                                    | Absolute Clearance  |                                  |                                                     |           |                               |                      |                                   |                                              |
|                                                                                                    |                                    | Pre-menstrual Max                                          | IF >=4, CIRCLE Y; ELSE, CIRCLE N | # of Severe (>=4) Days                     | IF >=2, CIRCLE Y; ELSE, CIRCLE N          | Pre-menstrual Mean                                   | Post-menstrual Mean                                         | Raw Cyclical Change                                             | Woman's Scale Range (Constant) | Cyclical Change as % of Scale Range      | IF >=30%, CIRCLE Y; ELSE, CIRCLE N | Post-menses Maximum | IF <=3, CIRCLE Y; ELSE, CIRCLE N | IF ALL DIMENSIONS IN ROW=Y, CIRCLE Y; ELSE CIRCLE N |           |                               |                      |                                   |                                              |
| Identify Highest Item Rating Day -7 to -1                                                          |                                    | Count Number of Days Day -7 to -1 where Item Rating is >=4 |                                  | Calculate Average Item Rating Day -7 to -1 | Calculate Average Item Rating Day 4 to 10 | Subtract Post-menstrual Mean from Pre-menstrual Mean | Calculate Range: (Max Rating Across ALL DRSP Responses - 1) | Divide Raw Cyclical Change by Scale Range, then Multiply by 100 |                                | Identify Highest Item Rating Day 4 to 10 |                                    |                     |                                  |                                                     |           |                               |                      |                                   |                                              |
| Core Emotional Symptoms                                                                            | DRSP1 - Depressed, Blue            | Y or N                                                     | Y or N                           | -                                          | =                                         | /                                                    | =                                                           | Y or N                                                          | Y or N                         | Y or N                                   | Y or N                             | Y or N              | DEPRESSION                       | Y or N                                              | Y or N    |                               |                      |                                   |                                              |
|                                                                                                    | DRSP2 - Hopelessness               | Y or N                                                     | Y or N                           | -                                          | =                                         | /                                                    | =                                                           | Y or N                                                          | Y or N                         | Y or N                                   | Y or N                             | Y or N              | ANXIETY                          | Y or N                                              |           |                               |                      |                                   |                                              |
|                                                                                                    | DRSP3 - Worthlessness or Guilt     | Y or N                                                     | Y or N                           | -                                          | =                                         | /                                                    | =                                                           | Y or N                                                          | Y or N                         | Y or N                                   | Y or N                             | Y or N              | MOOD LABILITY                    | Y or N                                              |           |                               |                      |                                   |                                              |
|                                                                                                    | DRSP4 - Anxiety                    | Y or N                                                     | Y or N                           | -                                          | =                                         | /                                                    | =                                                           | Y or N                                                          | Y or N                         | Y or N                                   | Y or N                             | Y or N              | ANGER                            | Y or N                                              |           |                               |                      |                                   |                                              |
|                                                                                                    | DRSP5 - Mood Swings                | Y or N                                                     | Y or N                           | -                                          | =                                         | /                                                    | =                                                           | Y or N                                                          | Y or N                         | Y or N                                   | Y or N                             | Y or N              | INTEREST                         | Y or N                                              |           |                               |                      |                                   |                                              |
|                                                                                                    | DRSP6 - Rejection Sensitivity      | Y or N                                                     | Y or N                           | -                                          | =                                         | /                                                    | =                                                           | Y or N                                                          | Y or N                         | Y or N                                   | Y or N                             | Y or N              | CONCENTRATION                    | Y or N                                              |           |                               |                      |                                   |                                              |
|                                                                                                    | DRSP7 - Anger or Irritability      | Y or N                                                     | Y or N                           | -                                          | =                                         | /                                                    | =                                                           | Y or N                                                          | Y or N                         | Y or N                                   | Y or N                             | Y or N              | LETHARGY                         | Y or N                                              |           |                               |                      |                                   |                                              |
|                                                                                                    | DRSP8 - Interpersonal Conflict     | Y or N                                                     | Y or N                           | -                                          | =                                         | /                                                    | =                                                           | Y or N                                                          | Y or N                         | Y or N                                   | Y or N                             | Y or N              | APPETITE                         | Y or N                                              |           |                               |                      |                                   |                                              |
| Secondary Symptoms                                                                                 | DRSP9 - Less Interest              | Y or N                                                     | Y or N                           | -                                          | =                                         | /                                                    | =                                                           | Y or N                                                          | Y or N                         | Y or N                                   | Y or N                             | Y or N              | SLEEP                            | Y or N                                              |           |                               |                      |                                   |                                              |
|                                                                                                    | DRSP10 - Difficulty Concentrating  | Y or N                                                     | Y or N                           | -                                          | =                                         | /                                                    | =                                                           | Y or N                                                          | Y or N                         | Y or N                                   | Y or N                             | Y or N              | OVERWHELM                        | Y or N                                              |           |                               |                      |                                   |                                              |
|                                                                                                    | DRSP11 - Lethargy                  | Y or N                                                     | Y or N                           | -                                          | =                                         | /                                                    | =                                                           | Y or N                                                          | Y or N                         | Y or N                                   | Y or N                             | Y or N              | PHYSICAL                         | Y or N                                              |           |                               |                      |                                   |                                              |
|                                                                                                    | DRSP12 - Appetite, Overeating      | Y or N                                                     | Y or N                           | -                                          | =                                         | /                                                    | =                                                           | Y or N                                                          | Y or N                         | Y or N                                   | Y or N                             | Y or N              |                                  |                                                     |           |                               |                      |                                   |                                              |
|                                                                                                    | DRSP13 - Food Cravings             | Y or N                                                     | Y or N                           | -                                          | =                                         | /                                                    | =                                                           | Y or N                                                          | Y or N                         | Y or N                                   | Y or N                             | Y or N              |                                  |                                                     |           |                               |                      |                                   |                                              |
|                                                                                                    | DRSP14 - Hypersomnia               | Y or N                                                     | Y or N                           | -                                          | =                                         | /                                                    | =                                                           | Y or N                                                          | Y or N                         | Y or N                                   | Y or N                             | Y or N              |                                  |                                                     |           |                               |                      |                                   |                                              |
|                                                                                                    | DRSP15 - Insomnia                  | Y or N                                                     | Y or N                           | -                                          | =                                         | /                                                    | =                                                           | Y or N                                                          | Y or N                         | Y or N                                   | Y or N                             | Y or N              |                                  |                                                     |           |                               |                      |                                   |                                              |
|                                                                                                    | DRSP16 - Overwhelmed               | Y or N                                                     | Y or N                           | -                                          | =                                         | /                                                    | =                                                           | Y or N                                                          | Y or N                         | Y or N                                   | Y or N                             | Y or N              |                                  |                                                     |           |                               |                      |                                   |                                              |
|                                                                                                    | DRSP17 - Out of Control            | Y or N                                                     | Y or N                           | -                                          | =                                         | /                                                    | =                                                           | Y or N                                                          | Y or N                         | Y or N                                   | Y or N                             | Y or N              |                                  |                                                     |           |                               |                      |                                   |                                              |
|                                                                                                    | DRSP18 - Breast Tenderness         | Y or N                                                     | Y or N                           | -                                          | =                                         | /                                                    | =                                                           | Y or N                                                          | Y or N                         | Y or N                                   | Y or N                             | Y or N              |                                  |                                                     |           |                               |                      |                                   |                                              |
|                                                                                                    | DRSP19 - Swelling, Bloating        | Y or N                                                     | Y or N                           | -                                          | =                                         | /                                                    | =                                                           | Y or N                                                          | Y or N                         | Y or N                                   | Y or N                             | Y or N              |                                  |                                                     |           |                               |                      |                                   |                                              |
|                                                                                                    | DRSP20 - Headache                  |                                                            |                                  |                                            |                                           |                                                      |                                                             |                                                                 |                                |                                          |                                    |                     |                                  |                                                     |           |                               |                      |                                   |                                              |
|                                                                                                    | DRSP21 - Joint, Muscle Pain        | Y or N                                                     | Y or N                           | -                                          | =                                         | /                                                    | =                                                           | Y or N                                                          | Y or N                         | Y or N                                   | Y or N                             | Y or N              |                                  |                                                     |           |                               |                      |                                   |                                              |
| Interference                                                                                       | DRSP22 - Work Interference         |                                                            |                                  |                                            |                                           |                                                      |                                                             |                                                                 |                                |                                          |                                    |                     |                                  |                                                     |           |                               |                      |                                   |                                              |
|                                                                                                    | DRSP23 - Hobby Interference        |                                                            |                                  |                                            |                                           |                                                      |                                                             |                                                                 |                                |                                          |                                    |                     |                                  |                                                     |           |                               |                      |                                   |                                              |
|                                                                                                    | DRSP24 - Relationship Interference |                                                            |                                  |                                            |                                           |                                                      |                                                             |                                                                 |                                |                                          |                                    |                     |                                  |                                                     |           |                               |                      |                                   |                                              |
| <b>CYCLE-LEVEL SCORING</b>                                                                         |                                    |                                                            |                                  |                                            |                                           |                                                      |                                                             |                                                                 |                                |                                          |                                    |                     |                                  |                                                     |           |                               |                      |                                   |                                              |
| DSM-5 CRITERION A: CORE EMOTIONAL SYMPTOM: Does a core emotional symptom meet criteria this cycle? |                                    |                                                            |                                  |                                            |                                           |                                                      |                                                             |                                                                 |                                |                                          |                                    |                     |                                  | YES or NO                                           |           |                               |                      |                                   |                                              |
| DSM-5 CRITERION B: NUMBER OF SYMPTOMS: Do at least 5 DSM-5 symptoms meet criteria this cycle?      |                                    |                                                            |                                  |                                            |                                           |                                                      |                                                             |                                                                 |                                |                                          |                                    |                     |                                  | Count # of Ys Above: ___                            | YES or NO |                               |                      |                                   |                                              |
| IF A=NO, CYCLE DOES NOT MEET MRMD or PMDD CRITERIA; CIRCLE "NO CYCLE DIAGNOSIS" AT RIGHT           |                                    |                                                            |                                  |                                            |                                           |                                                      |                                                             |                                                                 |                                |                                          |                                    |                     |                                  | NO CYCLE DIAGNOSIS                                  |           |                               |                      |                                   |                                              |
| IF A=YES and B=NO, CYCLE MEETS MRMD CRITERIA; CIRCLE "CYCLE-LEVEL MRMD DIAGNOSIS" AT RIGHT         |                                    |                                                            |                                  |                                            |                                           |                                                      |                                                             |                                                                 |                                |                                          |                                    |                     |                                  | MRMD CYCLE DIAGNOSIS                                |           |                               |                      |                                   |                                              |
| IF A=YES and B=YES, CYCLE MEETS PMDD CRITERIA; CIRCLE "CYCLE-LEVEL PMDD DIAGNOSIS" AT RIGHT        |                                    |                                                            |                                  |                                            |                                           |                                                      |                                                             |                                                                 |                                |                                          |                                    |                     |                                  | PMDD CYCLE DIAGNOSIS                                |           |                               |                      |                                   |                                              |
